# Supplementary material for: SiO2/TiO2based hollow nanostructures as scaffold layers and Al-doping in the electron transfer layer for efficient perovskite solar cells
Source: Royal Society of Chemistry journal article supplement (doi:10.1039/c5ta08250a), 2015-12-09
Supplement: c5ta08250a1.pdf [file c5ta08250a1.pdf]

## Supporting Information

### **SiO<sub>2</sub>/TiO<sub>2</sub> Based Hollow Nanostructures as Scaffold Layers and Al-doping in Electron Transfer Layer for Efficient Perovskite Solar Cells**

*Juyoung Yun, Jaehoon Ryu, Jungsup Lee, Haejun Yu and Jyongsik Jang\**

[\*] Prof. Jyongsik Jang

School of Chemical and Biological Engineering,  
Seoul National University, 599 Gwanangno, Gwanakgu, Seoul 151-742, Korea  
E-mail: [jsjang@plaza.snu.ac.kr](mailto:jsjang@plaza.snu.ac.kr)  
Tel.: +82-2-880-7069  
Fax: +82-2-880-1604

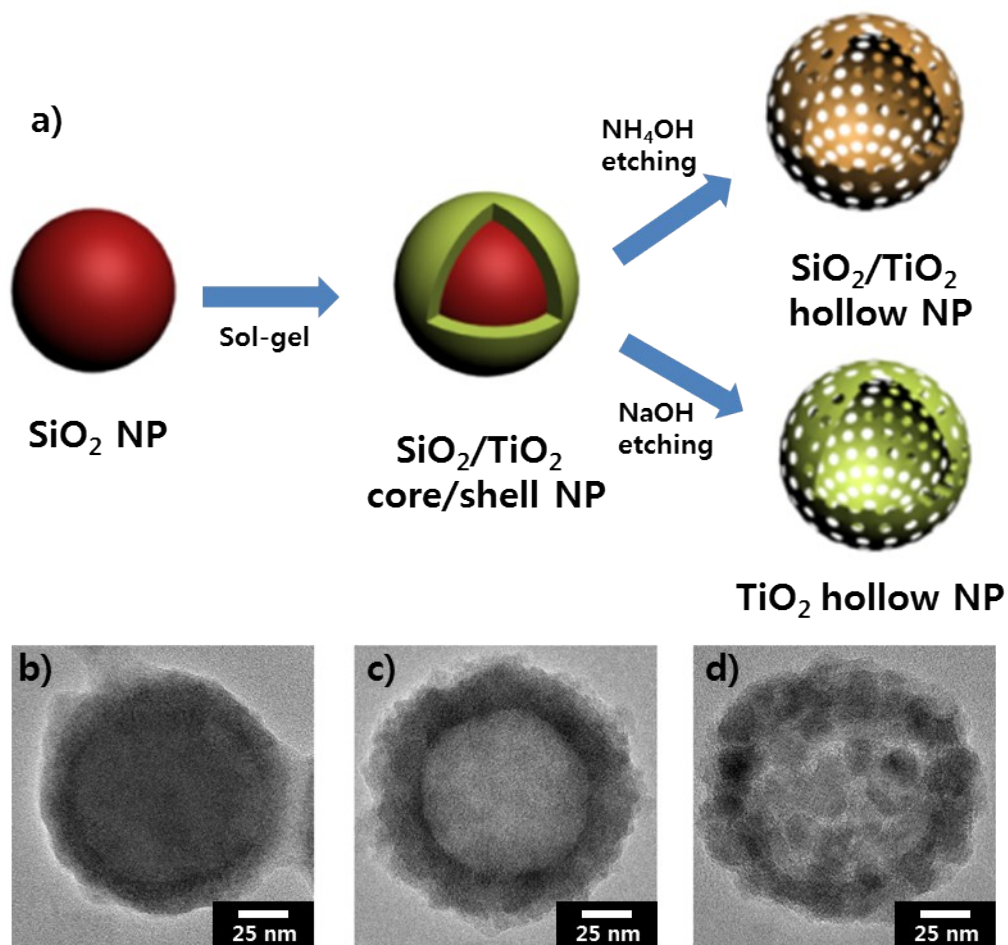

**Fig. S1.** a) Schematic illustration of the synthesis of hollow nanoparticles. HR-TEM images of b) STCSNP, c) STHNP, d) THNP.

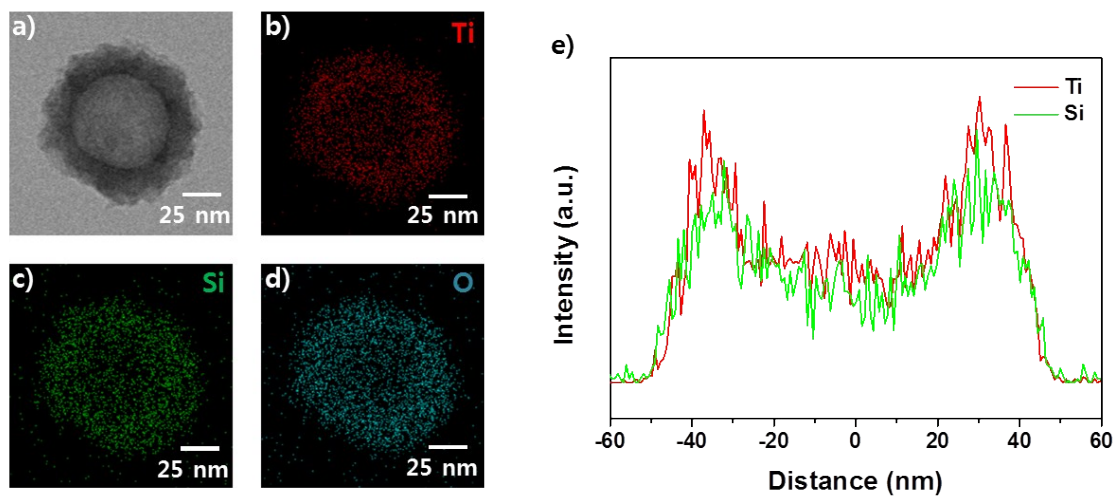

**Fig. S2.** a) STEM images of STHNP and elemental dot mapping of b) Ti, c) Si, d) O. e) STEM-EDS line mapping of STHNP.

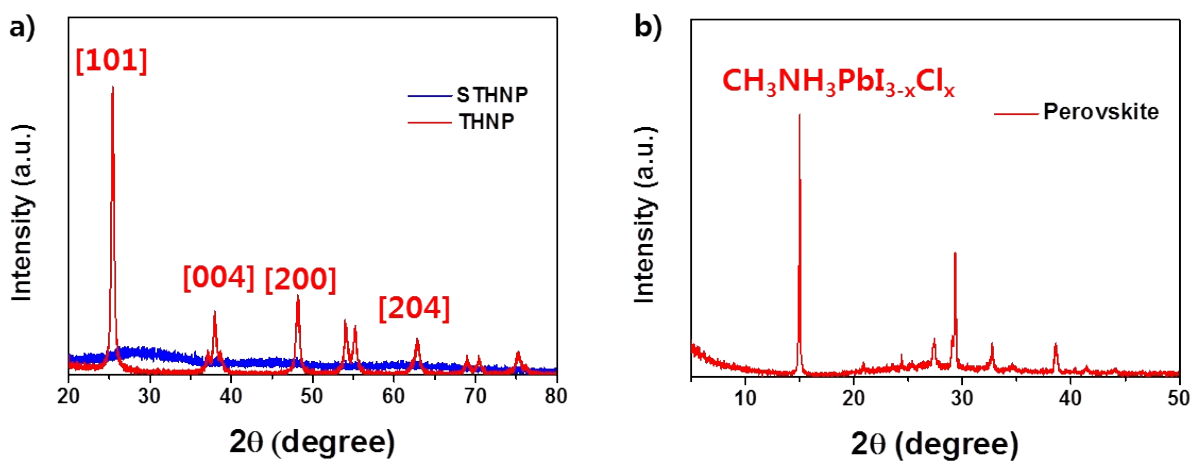

**Fig. S3.** XRD analysis of a) STHNPs and THNPs, b) annealed perovskite films.

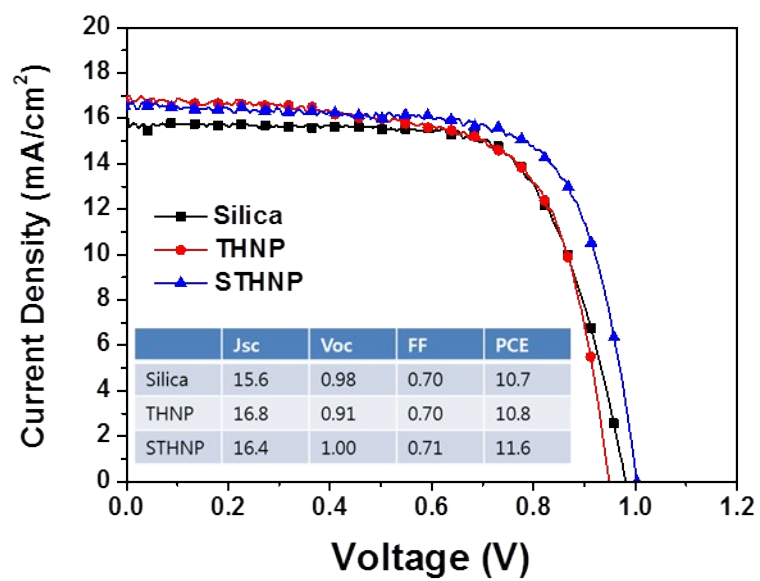

**Fig. S4.** Current density-voltage curve of perovskite solar cells based on silica, THNPs, and STHNPs. Photovoltaic parameters are summarized in the inset table.

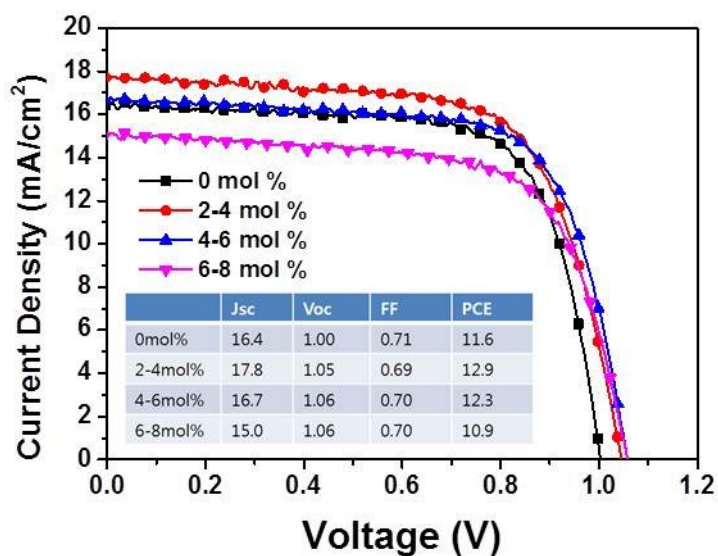

**Fig. S5.** Current density-voltage curve of perovskite solar cells based on Al-doping concentration. Photovoltaic parameters are summarized in the inset table.

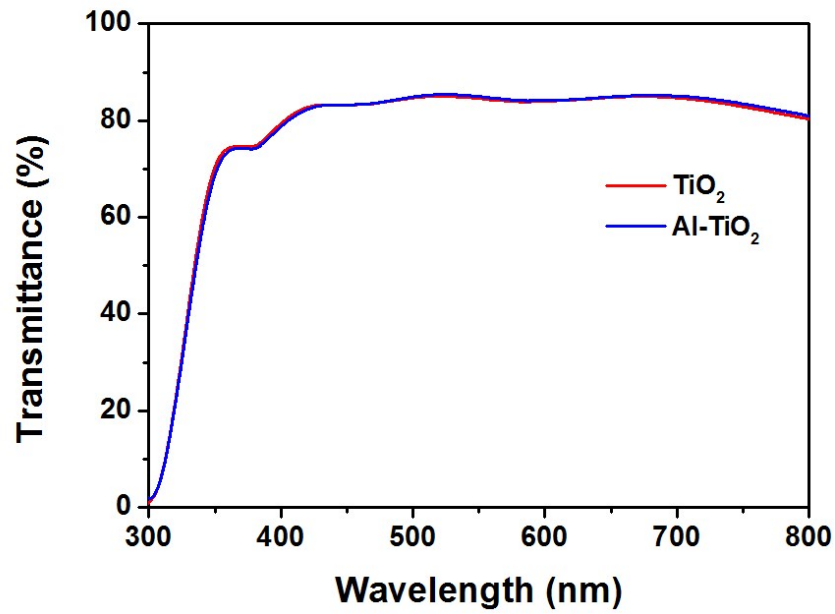

**Fig. S6.** Transmittance spectra of the TiO<sub>2</sub> and Al-TiO<sub>2</sub> compact layer.

The transmittance change of compact layer by Al-doping could effect on the current density of PSCs. Fig. S6 shows the transmittance spectra of TiO<sub>2</sub> and Al-TiO<sub>2</sub> compact layer. There was no change in the transmittance of compact layer after Al-doping (0.2-0.4 mol%) in TiO<sub>2</sub>.

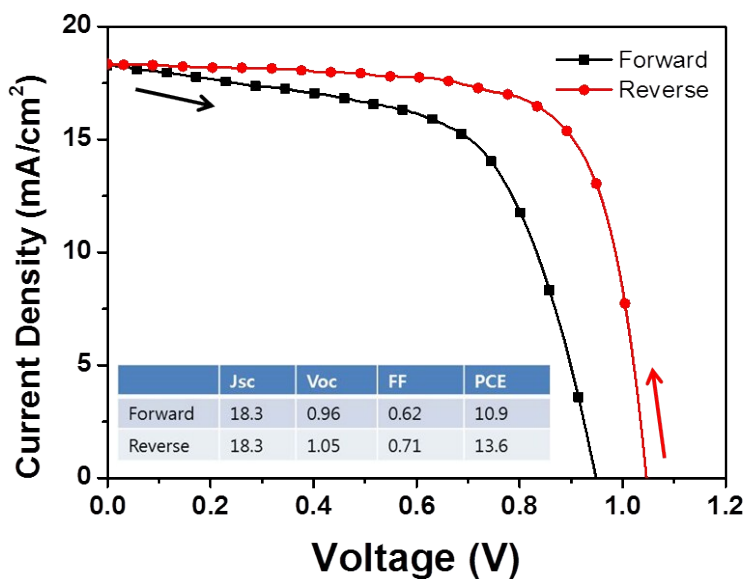

**Fig. S7.** Hysteresis analysis of PSC based on STHNPs as scaffold layer and Al-TiO<sub>2</sub> compact layer. Photovoltaic parameters are summarized in the inset table.

**Fig. S7** exhibits the  $J$ - $V$  curve for PSC based on STHNPs as scaffold layer and Al-TiO<sub>2</sub> compact layer in forward and reverse scan mode with 0.35 V/s scan rate. The inset table summarizes the photovoltaic parameters. The forward scan showed 18.3 mA/cm<sup>2</sup> of  $J_{sc}$ , 0.96 V of  $V_{oc}$ , 0.62 of  $FF$ , and 10.9 % of PCE. On the other hand, the reverse scan exhibited 18.3 mA/cm<sup>2</sup> of  $J_{sc}$ , 1.05 V of  $V_{oc}$ , 0.71 of  $FF$ , and 13.6 % of PCE, respectively.



**Table S1.** Conductivity of TiO<sub>2</sub> and Al-TiO<sub>2</sub> compact layer.

|                                    | TiO <sub>2</sub>        | Al-TiO <sub>2</sub>     |
|------------------------------------|-------------------------|-------------------------|
| Conductivity (S cm <sup>-1</sup> ) | 1.58 × 10 <sup>-4</sup> | 2.74 × 10 <sup>-4</sup> |

The conductivity of TiO<sub>2</sub> and Al-TiO<sub>2</sub> compact film was measured by 2-point measurement using two gold electrodes to confirm the enhancement of electronic properties.<sup>1</sup> The channel length and the width were 0.2 mm and 1 mm, respectively. Table S1 certifies that the Al-doping in TiO<sub>2</sub> increased the conductivity. This increase could improve the carrier transport.

#### Reference

1. H.-H. Wang, Q. Chen, H. Zhou, L. Song, Z. S. Louis, N. D. Marco, Y. Fang, P. Sun, T.-B. Song, H. Chen and Y. Yang, *J. Mater. Chem. A*, 2015, **3**, 9108-9115.
